# Supplementary material for: Nano-Spray-Dried Levocetirizine Dihydrochloride with Mucoadhesive Carriers and Cyclodextrins for Nasal Administration
Source: MDPI journal article supplement (doi:10.3390/pharmaceutics15020317), 2023-01-18
Supplement: s1 [file s1]

## Supplementary

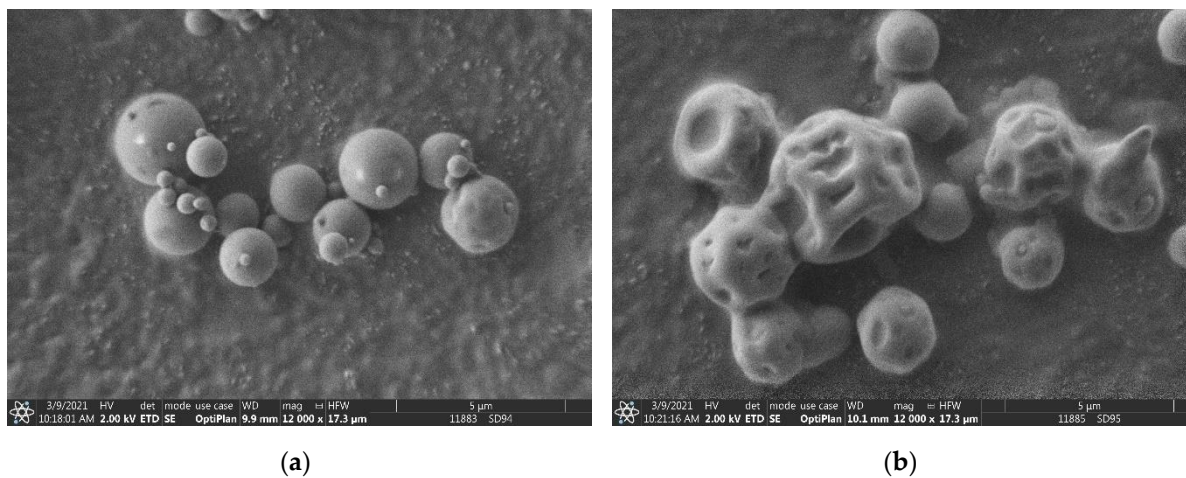

**Figure S1.** SEM images of SD3 (HPBCD) (a) and SD4 (RAMEB) (b) samples.

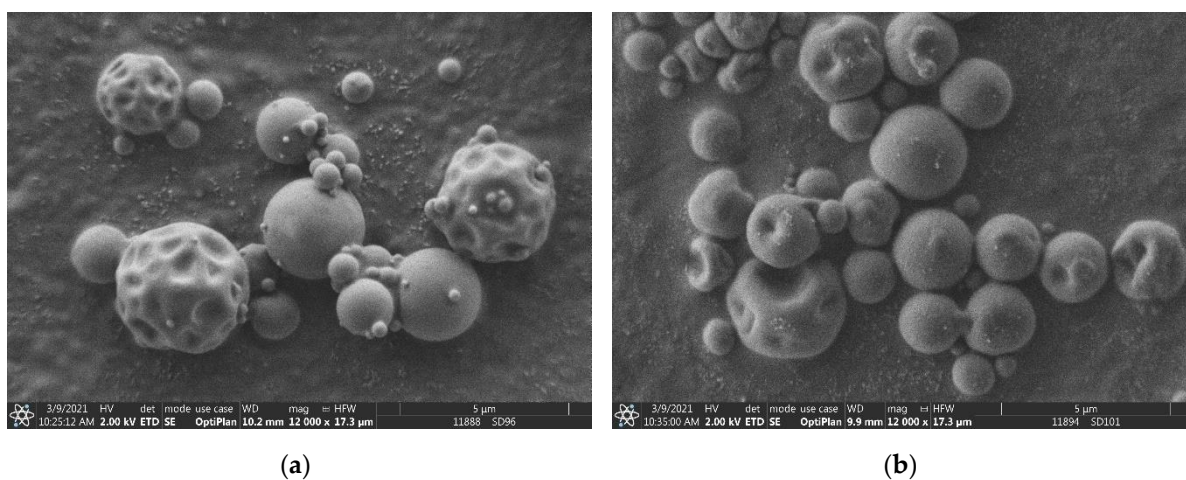

**Figure S2.** SEM images of SD5 (β-CD) (a) and SD8 (HPMC) (b) samples.
